# 1                   **Pharmacokinetics and pharmacodynamics of inhaled** 2                   **antipseudomonal bacteriophage therapy in mice**

3                   Running title: PK and PD of inhaled phage therapy in mice

4 Michael Y.T. Chow<sup>a,\*</sup>, Rachel Yoon Kyung Chang<sup>a,\*</sup>, Mengyu Li<sup>a</sup>, Yuncheng Wang<sup>a</sup>, Yu Lin<sup>a</sup>,  
5 Sandra Morales<sup>b</sup>, Andrew J McLachlan<sup>c</sup>, Elizabeth Kutter<sup>d</sup>, Jian Li<sup>e</sup>, Hak-Kim Chan<sup>a, #</sup>

6           a. Advanced Drug Delivery Group, The University of Sydney, Faculty of Medicine and  
7           Health, School of Pharmacy, Sydney, New South Wales, Australia;

8                   MTYC: [ye.chow@sydney.edu.au](mailto:ye.chow@sydney.edu.au); RYKC: [yoon.chang@sydney.edu.au](mailto:yoon.chang@sydney.edu.au); ML:  
9                   [meli3816@uni.sydney.edu.au](mailto:meli3816@uni.sydney.edu.au); YW: [ywan9552@uni.sydney.edu.au](mailto:ywan9552@uni.sydney.edu.au); YL:  
10                   [ylin9418@uni.sydney.edu.au](mailto:ylin9418@uni.sydney.edu.au); HKC: [kim.chan@sydney.edu.au](mailto:kim.chan@sydney.edu.au)

11           b. Phage Consulting, Sydney, New South Wales, Australia;

12                   SM: [morales.sandra@gmail.com](mailto:morales.sandra@gmail.com)

13           c. The University of Sydney, Faculty of Medicine and Health, School of Pharmacy, Sydney,  
14           New South Wales, Australia;

15                   AJM: [Andrew.mclachlan@sydney.edu.au](mailto:Andrew.mclachlan@sydney.edu.au)

16           d. The Evergreen State College, Olympia, Washington 98502, USA;

17                   EK: [kutterB@evergreen.edu.au](mailto:kutterB@evergreen.edu.au)

18           e. Biomedicine Discovery Institute and Department of Microbiology, Monash University,  
19           Clayton, Victoria 3800, Australia.

20                   JL: [jian.li@monash.edu](mailto:jian.li@monash.edu)

21           \* These authors contributed equally to the work.

22           # Corresponding author: Professor Hak-Kim Chan

23           Email: [kim.chan@sydney.edu.au](mailto:kim.chan@sydney.edu.au)

24           Phone: +61 2 9351 3054

25           Address: Room S341, Building A15, Science Road, School of Pharmacy, Faculty of Medicine  
26           and Health, University of Sydney, Camperdown, NSW, 2006, Australia

27  
28

29 **Abstract**

30 Inhaled bacteriophage (phage) therapy is a potential alternative to conventional antibiotic therapy  
31 to combat multidrug-resistant (MDR) *Pseudomonas aeruginosa* infections. However,  
32 pharmacokinetics (PK) and pharmacodynamics (PD) of phages are fundamentally different to  
33 antibiotics and the lack of understanding potentially limits optimal dosing. The aim of this study  
34 was to investigate the *in vivo* PK and PD profiles of antipseudomonal phage PEV31 delivered by  
35 pulmonary route in mice. BALB/c mice were administered phage PEV31 at doses of  $10^7$  and  $10^9$   
36 PFU by the intratracheal route. Mice ( $n = 4$ ) were sacrificed at 0, 1, 2, 4, 8 and 24 h post-  
37 treatment and various tissues (lungs, kidney, spleen and liver), bronchoalveolar lavage and blood  
38 were collected for phage quantification. In a separate study, mice ( $n = 4$ ) were treated with  
39 PEV31 ( $10^9$  PFU) or PBS at 2 h post-inoculation with MDR *P. aeruginosa*. Infective PEV31 and  
40 bacteria were enumerated from the lungs. In the phage only study, PEV31 titer gradually  
41 decreased in the lungs over 24 hours with a half-life of approximately 8 h for both doses. In the  
42 presence of bacteria, PEV31 titer increased by almost 2- $\log_{10}$  in the lungs at 16 h. Furthermore,  
43 bacterial growth was suppressed in the PEV31-treated group, while the PBS-treated group  
44 showed exponential growth. Some phage-resistant colonies were observed from the lung  
45 homogenates sampled at 24 h post-phage treatment. These colonies had a different antibiogram  
46 to the parent bacteria. This study provides evidence that pulmonary delivery of phage PEV31 in  
47 mice can reduce the MDR bacterial burden.

48 **Keywords:** bacteriophage (phage), pseudomonas, pulmonary delivery, pulmonary infection;  
49 pharmacokinetics (PK), pharmacodynamics (PD), multidrug-resistant (MDR) infection

50

## 51 **Introduction**

52 Since the discovery of penicillin, much effort has been targeted towards understanding the  
53 pharmacokinetics (PK) and pharmacodynamics (PD) of antibiotics to guide safe and effective  
54 treatment regimens. While bacteria can be intrinsically resistant to antibiotics, the inappropriate  
55 use of antibiotics has subjected bacteria to high selective pressure, leading to the advent of  
56 resistant strains at an alarming rate and now poses a serious global threat to human health. The  
57 severe threat of antimicrobial resistance remains imminent (1) and the World Health  
58 Organization has called for global action to tackle this crisis (2). Unfortunately, the antibiotic  
59 discovery pipeline is drying with a lack of novel antimicrobial agents against Gram-negative  
60 bacteria (3). In particular, the emergence of multidrug-resistant (MDR) *Pseudomonas aeruginosa*  
61 strains presents a major public health risk due to their prevalent intrinsic and acquired resistance  
62 to most antibiotics (4). MDR *P. aeruginosa* causes complications of respiratory infections  
63 associated with high morbidity and mortality rates in many diseases, including bronchiectasis,  
64 cystic fibrosis, chronic obstructive pulmonary disease and pneumonia (4).

65 Bacteriophages (phages) are naturally occurring bactericidal virus that infect targeted host  
66 bacteria. They are recently rediscovered and reintroduced as potential antimicrobial treatment  
67 and are considered an attractive solution to the increasing failure of antibiotics (5). Phage therapy  
68 predominantly relies on the lytic life cycle of phages. Virulent (lytic) phages recognize and  
69 attach to surface receptors of host bacterium, inject their genetic material and then utilize the  
70 metabolic machineries of the host for self-replication (5). Up to hundreds of progenies can be  
71 produced and then released into the surrounding during bacteriolysis. Phage therapy has distinct  
72 advantages over conventional antibiotic treatment in that phages are (i) a naturally occurring  
73 antibacterial, (ii) self-replicating, (iii) self-limiting upon resolution of infection, (iv) effective  
74 against both MDR or antibiotic sensitive bacteria, (v) highly specific with low inherent toxicity,  
75 (vi) able to co-evolve with bacteria, and (vii) able to penetrate biofilms (5). The potential use of  
76 phages as antibacterial agents has been demonstrated in *in vitro* (6, 7), preclinical (8-11) and in  
77 compassionate single case studies (12-14).

78 Despite these advantages and potential, development and application of phage therapy has been  
79 relatively slow. A possible reason is that the current understanding and paradigm associated with

80 antibiotic treatment cannot be transferred directly to phages (15). The PK and PD of phages are  
81 fundamentally different from those of conventional antibiotics. While many antibiotics are small  
82 molecules, phages are nano-sized virus composed of proteins, nucleic acids (DNA or RNA) and  
83 sometimes lipids. In addition, phages have a unique dynamic with their bacterial host as self-  
84 replicating biopharmaceuticals (15). The PK/PD of phages are determined by their antibacterial  
85 activities featuring self-replication, phages and bacteria coevolution, as well as the human  
86 immune system in response to the two concurrent events (16).

87 Inhaled phage therapy holds remarkable potential to treat respiratory infections caused by  
88 bacteria, including MDR isolates (5). With oral inhalation route for delivery to the lung, high  
89 concentration of phages can be delivered to the site of infection in the respiratory tract, achieving  
90 high pulmonary bioavailability. Inhaled phage therapy has been used in Eastern European  
91 countries to treat bacterial respiratory infections that was otherwise untreatable with antibiotics.  
92 A 7-year old cystic fibrosis patient received inhaled phage therapy in 2011, which dramatically  
93 reduced the MDR *P. aeruginosa* and *Staphylococcus aureus* numbers in the lungs (12). Although  
94 inhaled phage therapy has been practiced in Eastern Europe for many decades, the phage  
95 viability in nebulized aerosol droplets has only recently been investigated. Our group and others  
96 have demonstrated that inhalable aerosolized *Pseudomonas* phages remain biologically active  
97 when a suitable nebulizer system is used (17-20). Although the feasibility of producing infective  
98 phage aerosols have been well-established, there is a lack of understanding of *in vivo* PK and PD  
99 profiles of phages and bacteria in the lungs. The aim of this study is to investigate the PK and PD  
100 profiles of *Pseudomonas* phage PEV31 administered by pulmonary delivery in a neutropenic  
101 murine model of respiratory infection.

## 102 **Materials and methods**

### 103 *Bacteriophage*

104 Anti-Pseudomonas phage PEV31 was isolated from the sewage plant in Olympia (WA, USA) by  
105 the Evergreen Phage Lab (Kutter Lab). PEV31 belongs to the *Podoviridae* family. Stocks of the  
106 phage were amplified using the Phage-on-Tap protocol (21) with minor modifications. Briefly,  
107 200 mL of Nutrient Broth (NB, Amyl Media, Australia) supplemented with 1 mM of CaCl<sub>2</sub> and  
108 MgCl<sub>2</sub> were mixed with 0.1 volumes of overnight bacterial host (*P. aeruginosa* dog-ear strain  
109 PAV237). The mixture was incubated for 1 h with continuous shaking (220 rpm) at 37°C. A  
110 volume (200 µL) of PEV31 lysate at 10<sup>9</sup> plaque forming units (PFU)/mL was added, followed by  
111 further incubation for 8 h. The mixture was centrifuged at 4000 × g for 20 min and the  
112 supernatant was filter-sterilized using 0.22 µm polyethersulfone membrane filter. The phage  
113 lysate was further purified and concentrated using ultrafiltration (100 kDa Amicon® Ultra-15  
114 centrifugal filter, Sigma, Australia), and the media was replaced with phosphate-buffered saline  
115 (PBS) supplemented with 1 mM CaCl<sub>2</sub>. Bacterial endotoxins were removed by adding 0.4  
116 volumes of 1-octanol, followed by vigorous shaking at room temperature for 1 h. The mixture  
117 was centrifuged at 4000 g for 10 min and then the aqueous phase was collected. Residual organic  
118 solvent was removed by centrifuging down the phages at 20,000 g for 1.5 h and then replacing  
119 the buffer with fresh PBS supplemented with 1 mM CaCl<sub>2</sub>.

### 120 *Endotoxin level quantification*

121 The Endosafe® Portable Test System (Charles River Laboratories, Boston, USA) was used as per  
122 the manufacturer's instructions to quantify endotoxin level in the resulting phage lysates. The  
123 single use LAL assay cartridges contain four channels to which the LAL reagent and a  
124 chromogenic substrate have been pre-applied. A single cartridge enables duplicate measurements  
125 of the sample and positive control with a known endotoxin concentration. The sensitivity of the  
126 Readouts between 50% and 200% spike recovery are deemed acceptable. The sensitivity of the  
127 assay was 1 – 10 EU/mL. Endotoxin-free water, tips and tubes were used at all times.

### 128 *Bacterial strain and phage-susceptibility testing*

129 *P. aeruginosa* FADDI-PA001 was used to induce bacterial infection in the mice used in this  
130 study. The strain is an MDR clinical isolate provided by Li lab, Monash University, Australia (8).  
131 Phage-susceptibility of this isolate was assessed using a spot test (6). Briefly, 5 mL of 0.4%  
132 Nutrient Broth top agar was mixed with overnight culture of FADDI-PA001 (approximately  $2 \times$   
133  $10^8$  colony forming units, CFU) and then overlaid onto a 1.5% Nutrient Agar plate. Then, 10  
134  $\mu$ L of a phage stock solution was spotted on the top agar plate, air-dried and incubate at 37°C for  
135 24 h. After incubation, the appearance of the lysis zone was assessed for phage-susceptibility.

### 136 *Animals*

137 Female BALB/c mice of 6 – 8 weeks were obtained from Australian BioResources Ltd (Moss  
138 Vale, New South Wales, Australia). The mice were housed under a 12-hour dark-light cycle with  
139 *ad libitum* supply to standard chow diet and water. All animal experiments conducted were  
140 approved by the University of Sydney Animal Ethics Committee.

### 141 *Pharmacokinetics of PEV31 after intratracheal administration*

142 Healthy (non-infected) mice were anaesthetized by intraperitoneal injection of ketamine /  
143 xylazine mixture (80 mg/kg and 10 mg/kg, respectively) in 150  $\mu$ l PBS. Upon deep anesthesia as  
144 confirmed by the absence of pedal reflex, the anaesthetized mouse was suspended on a nylon  
145 floss by its incisor teeth and placed on an inclined intubation board. The trachea was then gently  
146 intubated with a soft plastic guiding cannula. PEV31 at two different doses ( $10^7$  and  $10^9$  PFU)  
147 suspended in 25  $\mu$ L PBS was administered into the trachea through the guiding cannula with a  
148 micropipette and a 200  $\mu$ L gel-loading pipette tip. At 0 (immediately after administration), 1, 2, 4,  
149 8 and 24 h post-phage administration, mice ( $n \geq 4$ ) were terminally anaesthetized by  
150 intraperitoneal injection of an overdose of ketamine / xylazine mixture (300 mg/kg and 30 mg/kg,  
151 respectively). Broncho-alveolar lavage (BAL), lung, kidney, spleen, liver and blood samples  
152 were collected (**Figure 1A**). BAL was performed by instilling 1.5 mL PBS (as three aliquots of  
153 0.5 mL) through the trachea to the lung and collecting the lavage suspension. Approximately 1.2  
154 to 1.3mL of lavage suspension was recovered. Harvested tissues were homogenized by  
155 TissueRuptor II with plastic probes (QIAGEN, Hilden, Germany) in cold PBS under ice-water

156 bath for 30 seconds. Tissue homogenates were kept at 2 – 8 °C until phage quantification by  
157 plaque assay (described below). Plaque assay was performed within 3 hours of sample collection.

### 158 *Pseudomonas pulmonary infection*

159 A neutropenic murine model (8) was used to establish pulmonary *P. aeruginosa* infection. Two  
160 doses of cyclophosphamide were intraperitoneally administered 4 days (150 mg/kg) and 1 day  
161 (100 mg/kg) prior to infection. On the day of infection, the FADDI-001 bacterial suspension at  
162 its early logarithmic growth phase was inoculated intratracheally at a concentration of 10<sup>6</sup> CFU  
163 in 25 µL, as described above. At 2 h post-infection, PEV31 suspension (10<sup>9</sup> PFU in 25 µL PBS)  
164 or sterile PBS of equal volume (as untreated control) was intratracheally administered to the  
165 infected mice. Following terminal anesthesia as described above, BAL and other tissues were  
166 collected at 0 (immediately after bacteria inoculation), 2 (immediately after phage  
167 administration), 4, 8, 16 and 26 h post-infection ( $n = 4$ ) (**Figure 1B**). Collected tissues were  
168 homogenized in cold PBS. Bacterial load and phage concentrations in the tissue homogenates  
169 and BAL were stored on ice at all times and analyzed within two hours using plaque assay and  
170 colony counting, respectively, as described below. Bacteria enumeration was performed as soon  
171 as practically possible and was not later than 2 hours after sample collections. Plaque assay was  
172 performed within 3 hours of sample collection.

### 173 *Plaque assay*

174 BAL and tissue homogenates were serially diluted in PBS for phage quantification. For samples  
175 from infected animals, bacteria were first removed from the homogenates and BAL samples by  
176 filtering through 0.22 µm polyethersulfone membrane filter before dilution. A volume of  
177 reference bacterial host (PAV237) containing  $2 \times 10^8$  CFU at stationary phase was mixed with 5  
178 mL of Nutrient Broth top agar. The mixture was overlaid on top of a Nutrient Agar plate and  
179 dried for 15 min. Then, 20 µL of serially diluted phage suspension were dropped on top of the  
180 top agar plate, left to air dry, and then incubated for 24 h at 37°C. The diluted samples were  
181 analyzed in triplicate.

### 182 *Bacteria enumeration*



183 Phage-inactivation was performed prior to bacteria enumeration to prevent bactericidal activities  
184 of phages and impede reduction of CFU counts *ex vivo*. Furthermore, all samples were kept on  
185 ice at all times to minimize the risk of phage-bacteria interactions *in vitro*. The samples were  
186 treated with tannic acid (20 mg/L) and ferrous sulfate (2.5 mM) to inactivate the phage PEV31  
187 and then treated with 2% Tween 80 in PBS to stop the interaction. The phage-inactivated lung  
188 homogenate was filtered through a sterile filter bag (bag stomacher filter with a pore size of 280  
189  $\mu\text{m}$ , Labtek Pty Ltd., Australia). Filtrate samples and BAL were serially diluted in PBS and then  
190 spiral plated on Nutrient Agar plates using an automatic spiral plater (WASP, Don Whitley  
191 Scientific, United Kingdom). The plates were air-dried and then incubated for 24 h at 37°C.  
192 Colonies were counted using a ProtoCOL automated colony counter (Synbiosis, United  
193 Kingdom).

#### 194 *Minimum inhibitory concentration*

195 Bacterial colonies from the spiral plates ( $t = 0$  and 26 h) were taken and inoculated in Nutrient  
196 Broth. The antibiogram of these colonies was assessed by determining the minimum inhibitory  
197 concentrations (22) of selected antibiotics, including ciprofloxacin, tobramycin, colistin and  
198 aztreonam. A volume (190  $\mu\text{L}$ ) of early-log phase bacterial culture ( $1 \times 10^6$  CFU/mL) was mixed  
199 with 10  $\mu\text{L}$  of antibiotics (0.25, 0.5, 1, 2, 4, 8, 16, 32, 64  $\mu\text{g}/\text{mL}$ ). The treated bacterial culture  
200 was incubated for 24 h at 37°C with continuous shaking at 220 rpm. Optical density at 600 nm  
201 ( $\text{OD}_{600}$ ) was measured using a microplate reader (Victor multilabel Plate Reader, Perkin Elmer,  
202 United States).

#### 203 *Cytokine quantification*

204 The BAL collected was centrifuged at  $400 \times g$  for 10 min, and the supernatant was collected as  
205 the broncho-alveolar lavage fluid (BALF). The levels of interleukin (IL)-6, TNF-alpha and IL-1 $\beta$   
206 (in infected mice) in BALF were quantified by enzyme-linked immunosorbent assay (ELISA)  
207 according to the manufacturer's protocol (DY406, DY410 and DY401 from R&D systems;  
208 Minnesota, USA). The UV absorbance at 450 nm and 570 nm were measured for the primary  
209 signal and for plate correction, respectively (Victor multilabel Plate Reader). The standard curves  
210 were constructed by 4-parameter logistic non-linear regression.



211 *Data analysis*

212 For the pharmacokinetics study, regression analysis on the phage titer (PFU) in lungs (lung  
213 tissues and BALF combined) over time was performed using simple exponential decay model.  
214 The exponential decay takes the form of  $P_t = P_0 \times e^{-kt}$  where  $P_t$  and  $k$  are the relative phage  
215 titer at time  $t$  and the rate constant (in  $\text{h}^{-1}$ ) respectively ( $P_0$  denoted the phage titer at time = 0). It  
216 follows that the half-life of the decay was given by  $\ln 2/k$ . The regression was performed using  
217 Prism software version 8.3 for Windows (GraphPad Software Inc., California, USA). The  
218 regressions were done with the sums of the squares weighted by the reciprocal of the dependent  
219 variables squared (*i.e.*  $1/y^2$ ).

220

## 221 **Results**

### 222 *Phage preparation and in vitro phage susceptibility*

223 The titer of purified PEV31 enumerated against the reference strain (PAV237) used for phage  
224 amplification was  $4 \times 10^{10}$  PFU/mL. Phage PEV31 formed a clear zone of lysis on top of overlay  
225 plate containing MDR *P. aeruginosa* isolate FADDI-001. PEV31 was highly efficacious *in vitro*  
226 against FADDI-001 with an efficiency of plating of 1. Endotoxin level in the purified phage  
227 lysate was 3.8 EU/mL (i.e. 0.095 EU in 25  $\mu$ L). The spike recovery was 130% and the  
228 coefficient of variation of the assay was 4%, which were all considered acceptable as per the  
229 manufacturer's recommendations.

### 230 *Pharmacokinetics of intratracheally administered PEV31*

231 Infectious PEV31 gradually decreased in the lungs (lung homogenate and BALF combined) over  
232 time regardless of the administered dose (**Figure 2**). At 24 h after IT administration, the phage  
233 titer dropped to 12.3% and 15.2% of the administered dose for the low ( $10^7$  PFU) and high ( $10^9$   
234 PFU) doses, respectively. The elimination of active phage could be adequately described using  
235 simple exponential decay model, with the adjusted weighted  $R^2$  being 0.864 and 0.956 for the  
236 low and high dose, respectively. The rate constant  $k$  was estimated to be  $0.0875 \text{ h}^{-1}$  (95% CI  
237  $0.0527$  to  $0.0924$ ) for the low dose and  $0.0797 \text{ h}^{-1}$  (95% CI  $0.0700$  to  $0.0871$ ) for the high dose,  
238 which are equivalent to a half-life of 7.9 (95% CI 7.5 to 13.2) and 8.7 (95% CI 8.0 to 9.9) hours,  
239 respectively. Infective PEV31 titer in other organs including kidney, liver, blood and spleen was  
240 extremely low and only accounted for less than 0.01% of the administered doses (**Figure 3**). The  
241 phage titer gradually increased over 24 hours in the liver of mice that received  $10^9$  PFU of  
242 PEV31. PEV31 suspension was well tolerated at a low dose without changes in inflammatory  
243 cytokine level (**Figure 4**). On the contrary, a transient upregulation of TNF- $\alpha$  and IL-6 activity  
244 was observed at 4 and 8 h post-administration, respectively when the mice were given a high  
245 dose of PEV31. Both cytokines returned to baseline at 24 h after the single IT dose.

### 246 *Pharmacodynamics of intratracheally administered PEV31*

247 In the infected only group, the bacteria continued to replicate without any significant stationary  
248 period (**Figure 5**). Initially, the bacteria grew exponentially for up to about 8 h post-infection  
249 (hpi), after which the growing rate decreased. In the infected mice treated with  $10^9$  PFU of  
250 PEV31 at 2 hpi, the bacterial load in lung remained mostly unchanged except for the initial drop  
251 at 4 hpi (2 h post-phage IT administration), conferring to more than 4-log reduction in bacterial  
252 load at 26 hpi. Some of the survived bacterial colonies at 26 hpi in the phage-treated group  
253 showed a different antibiogram profile in comparison with the parent bacteria used to inoculate  
254 each mouse (**Table 1**). The MIC value of ciprofloxacin decreased from 8 to 2  $\mu\text{g/mL}$ , while  
255 tobramycin and colistin increased from 8 to 64  $\mu\text{g/mL}$  and 4 to 32  $\mu\text{g/mL}$ , respectively. There  
256 were no apparent sensitivity changes to other antibiotics tested and all the tested bacterial  
257 colonies from PBS-treated group had the same MIC as the parent stock.

258 The phage-mediated bacterial killing was evident by increase of infectious phage particles over  
259 time (around  $2\text{-log}_{10}$ ) at 24 h post-phage administration (**Figure 6**). Inflammatory cytokines  
260 activity (TNF- $\alpha$ , IL-1 $\beta$  and IL-6) in BALF were also measured as an evaluation of lung  
261 inflammation. In bacteria-infected only group, a substantial upregulation of all three cytokines  
262 was observed. TNF- $\alpha$  peaked at 4 hpi while the other two cytokines displayed peak activity at  
263 later time points. The upregulation of IL-1 $\beta$  activity considerably diminished at 26 hpi and to a  
264 lesser extent for TNF- $\alpha$ , but not for IL-6. Interestingly, the upregulation in cytokines was only  
265 partially suppressed by the phage treatment for IL-1- $\beta$  (23), but not for TNF- $\alpha$  and IL-6. In the  
266 phage-treated group, the peak of TNF- $\alpha$  appeared delayed to 8 hpi.

## 267 **Discussion**

268 This is the first study investigating PK and PD of intratracheally administered *Pseudomonas*  
269 phages *in vivo*. In previous studies with mice, the intranasal route has been widely used for  
270 initiation of lung infection and then phage treatment (24-26) likely due to ease of administration.  
271 These studies provide strong support for inhaled phage therapy with reduction in bacterial load  
272 and inflammation in the mouse lung infection model. Compared with intranasal route,  
273 intratracheal administration enables direct application of bacteria and phages to the mouse lungs  
274 with minimal loss in other parts of the respiratory route, including nose, throat and upper airways  
275 (8, 27). Hence, the exact phage doses of interest were given in the PK study, and in the PD study.

276 Despite these advantages, studies on intratracheal administration of phages for lung infections  
277 have been scarce (8, 28). In this study, intratracheal instillation was used to administer and assess  
278 the PK of phage PEV31 at two different doses.

279 The infectious phage PEV31 as quantified using plaque assay exhibited an exponential decay in  
280 the lung at both low and high doses with similar half-life (rate constant, **Figure 2**). After oral  
281 inhalation of phages to the lung, the phage titer dropped by  $1\text{-log}_{10}$  over 24 hours at both doses.  
282 Liu *et al.* studied the PK profile of *Siphoviridae* lytic mycobacteriophage D29 after doing  $5 \times 10^8$   
283 PFU via intra-tracheal route (28). The titer of D29 dropped to  $1.2\text{-log}_{10}$  by 24 hours post-  
284 administration. Using the same regression methodology on the titers reported by Liu *et al.*, we  
285 determined the half-life of D29 to be 5.8 hours, which is lower than our values of 7.9 – 8.7 hours  
286 for PEV31. Phage D29 belongs to the *Siphoviridae* family and has a longer phage tail as  
287 compared with PEV31 (*Podoviridae*). Whether there is a correlation between the family and/or  
288 the geometry of the phage particle and the rate of elimination warrants further investigations.  
289 Compared with phage delivered via intravenous injection (10), intra-tracheal route resulted in  
290 reduced systemic exposure (**Figure 3**).

291 Our current work has shown that the total titer of administered PEV31 phages in various organs  
292 do not add up to 100% of the delivered dose. No phage titer reduction was observed during the  
293 sample processing, including homogenization, filtration (0.22  $\mu\text{m}$  PES membrane and BagPage  
294 filter) and sample dilution. This implies that phage inactivation or degradation in the lungs  
295 and/or other organs are likely. Hence, both biodistribution of phages as well as  
296 degradation/inactivation may contribute to the titer reduction observed in the lungs over time.  
297 Plaque assay is the method of choice for quantifying infectious phages (29, 30). In a plaque assay,  
298 a zone of clearance (plaques) are formed on top of a bacterial lawn as a result of cycles of  
299 infection of the bacterial cells with phage progeny radiating from the original source of infection  
300 (31). It follows that only infectious phages can be enumerated. To evaluate the total number of  
301 viral particles – infectious, non-infectious and defective, genome quantification using qPCR can  
302 potentially be utilized (32, 33). The combination of qPCR and plaque assay could potentially  
303 help understand the biodistribution of infective phages as well as those that have been broken  
304 down or inactivated in different organs. This information may be particularly useful for  
305 estimating the total phage burden over time and correlating any long-term side effects associated

306 with accumulation of nano-sized virus particles in the various cavities during a prophylactic  
307 treatment. Nano-sized particles (<10 nm) can easily enter human tissues and disrupt the  
308 biochemical environment of normal cells (34-38). Nanoparticles mostly accumulate in the liver  
309 tissues and adverse unpredictable health outcomes have recently surfaced (39, 40). Our current  
310 study has shown that infective phage titer gradually increases in the liver over time, and there  
311 may be inactive or degraded phage particles further accumulated in the organ. The most  
312 significant phage phagocytosis function is thought to be played by the liver. Phages mostly  
313 accumulate in the liver (99%) after intravenous administration and the rate of phagocytosis by  
314 Kupffer cells are four times faster than splenic macrophages (41). The current study has shown  
315 that by delivering phages directly to the lungs, systemic exposure and liver-induced phagocytosis  
316 is substantially minimized.

317 In the current study, phage PEV31 at a high dose [0.095 EU; 4.75 EU/kg] resulted in an  
318 upregulation of the inflammatory cytokine TNF- $\alpha$  at 2 h post-administration, which then  
319 substantially increased at 4 h (**Figure 4**). The upregulation of IL-6 followed and then peaked at a  
320 later timepoint of 8 h. Upon phage administration, TNF- $\alpha$  and other inflammatory cytokines (e.g.  
321 IL-1) secreted from resident macrophages stimulated the release of other chemoattractant factors  
322 such as MIP-2, MCP-1 and IL-6, promoting the adherence of circulating inflammatory cells to  
323 the endothelium (28). The upregulation of both cytokines subsided at 24 h. Overexpression of  
324 these cytokines were absent when the mice were administered a lower dose. It has been reported  
325 that phages could trigger both inflammatory and anti-inflammatory responses (42), and  
326 endotoxin alone cannot explain all the observed upregulation of cytokines in the current study.  
327 Liu *et al.* reported no significant differences in leukocyte, neutrophils, lymphocytes and TNF- $\alpha$   
328 levels in the BALF at 24 h post-administration of D29 in healthy mice (28). However, the levels  
329 of these cytokines between 0 and 24 h post-administration is unknown and unfortunately, the  
330 endotoxin level in the phage preparations was unreported. In another study, intra-nasal  
331 administration of phages with endotoxin level of 0.0063 EU/mice (approx. 0.3 EU/kg) did not  
332 exhibit appreciable levels of TNF- $\alpha$  at 48 h post-treatment (9). Extremely low TNF- $\alpha$  and IL-6  
333 levels were similarly observed in the lungs of mice that received *Pseudomonas* phages via intra-  
334 nasal route at 24 h post-administration, although the endotoxin level of the phage lysate was  
335 unreported (24). These findings aligned with our observation, where the upregulation of

336 inflammatory cytokines subsided at 24 h post-administration. Hence, phage preparations with  
337 endotoxin levels even lower than that for parenteral and free of bacterial impurities should be  
338 considered for respiratory delivery (42) to ensure minimum toxicity (43), particularly in the case  
339 of prophylactic use. The current consensus is that phage therapy is safe (and has been so for  
340 decades) provided the phage preparation is sufficiently purified with low endotoxin level and  
341 other bacterial impurities (5, 44, 45). However, phage lysates originated from Gram-negative  
342 pathogens can be contaminated with endotoxins (lipopolysaccharides) and other proteins that are  
343 toxic to humans. Endotoxins are highly immunogenic and may cause septic shock by triggering  
344 cytokine signaling (46-48). The highest permitted endotoxin concentration for injection is 5  
345 EU/kg/h. Even purified phage preparations with extremely low endotoxin level (<0.1 EU) may  
346 induce some pro-inflammatory responses, which are caused by other bacterial proteins and  
347 nucleic acids present in the phage lysate (42). Hence, despite low endotoxin level in our PEV31  
348 preparation, bacterial proteins and other contaminants may have caused pro-inflammatory  
349 response in the murine lungs. Lung infection with *P. aeruginosa* caused significant increase in  
350 inflammatory cytokines (TNF- $\alpha$ , IL-1 $\beta$  and IL-6), with levels of IL-1 $\beta$  partially suppressed by  
351 phage treatment (**Figure 7**). Immune responses of phages are phage specific and some phages  
352 can even be anti-inflammatory such that bacteria clearance is reduced to promote phage  
353 propagation, as well as minimize the clearance of phages from the site of infection (42). Anti-  
354 inflammatory cytokines (e.g. IL-10) can be investigated in future studies to assess the potential  
355 role of phages as an anti-inflammatory agent.

356 MDR *P. aeruginosa* isolate FADDI-001 used in this study is a clinical strain isolated from an  
357 ICU patient and is resistant to multiple antibiotics including rifampicin, doxycycline,  
358 ciprofloxacin, amikacin, aztreonam and tobramycin. When PEV31 was administered two hours  
359 post infection, the growth of FADDI-001 was suppressed, suggesting the rate of bacteria  
360 replication was similar to that of bacteria removal through phage-killing or clearance by host  
361 immune response, with the former evident by the increase in phage titer (**Figure 6**). FADDI-001  
362 was highly susceptible to PEV31 *in vitro* but developed phage-resistance over time (upon  
363 overnight incubation) as reported for many naturally occurring phages under *in vitro* conditions.  
364 Bacteria can resist phage infection through different mechanisms, including (i) spontaneous  
365 mutations to prevent phage adsorption or phage DNA entry, (ii) restriction modification systems

366 to cut phage nucleic acids, and (iii) CRISPR-Cas system mediated adaptive immunity (49-53).  
367 When bacteria are pressured with a high number of infective phages, resistance can develop  
368 rapidly (54) by changing the bacterial surface components that act as phage-binding receptors.  
369 These receptors can be blocked by producing extracellular matrix or competitive inhibitors, or  
370 even be removed to prevent phage adsorption (49). Contrary to *in vitro* results (data not shown),  
371 some but not all bacteria at 24 hpi remained susceptible to the phage despite high initial MOI.  
372 This may be due to fundamental differences between *in vitro* and *in vivo* systems, such as the  
373 involvement of mammalian immune responses and heterogeneous mixing. For the latter, it is  
374 possible that bacteria and phages were not evenly mixed within the mouse lungs during  
375 administration (*i.e.* spatial constrain). Hence, not all the bacteria may have been exposed to the  
376 same stress and selective pressure despite high phage titer used in this study. Those colonies that  
377 became resistant to phage PEV31 showed a different antibiogram to phage-susceptible bacteria.  
378 In the fight to become phage-resistance, FADDI-001 developed increased sensitivity to  
379 ciprofloxacin (quinolone), but also developed increased resistance to tobramycin  
380 (aminoglycoside) and colistin (polymyxin) (Table 1). The changes to antibiogram suggests  
381 possible modifications in the bacterial cell envelope as a result of acquiring phage resistance.  
382 The susceptibility of amikacin (another aminoglycoside) remained the same, suggesting the  
383 phage-mediated mechanisms for the PEV31-FADDI-001 system to antibiotic susceptibility is  
384 antibiotic-specific. Reversal of antibiotic resistance of *P. aeruginosa* under selective pressure of  
385 phage has been reported (55). Chan *et al.* isolated a lytic *Pseudomonas* phage OMKO1 that binds  
386 to outer membrane porin M of the multidrug efflux systems. MDR *P. aeruginosa* developed  
387 resistance to OMKO1 within 24 h of incubation *in vitro*, while these phage-resistant bacteria  
388 regained sensitivity to ciprofloxacin, erythromycin, ceftazidime and tetracycline. Understanding  
389 the phage-mediated mechanisms to antibiotic susceptibility is outside the scope of this work.  
390 However, the data suggested the need to assess the impact of phage treatment on antibiotic  
391 susceptibilities for each phage-bacteria system, particularly if combined phage-antibiotic  
392 treatment is being considered in a clinical setting.

393 The current study used an acute lung infection mouse model and does not necessarily inform the  
394 PK and PD data in chronic infections, such as cystic fibrosis. One of the major challenges in  
395 conducting simultaneous PK/PD study of phage therapy in bacterial infection lies in the



396 continued interactions between bacterial host and phage even after sample collection. Procedures  
397 have been taken to minimize lysis of bacteria and phage propagation once the lung tissues have  
398 been harvested through physical separation by filtration and chemical inactivation by viricides.  
399 However, complete elimination of phage from bacteria in the tissue homogenates and removing  
400 phages that have already infected the bacteria could be difficult. Any remaining phages that have  
401 not been removed or inactivated could reduce the bacteria count and thus overestimate phage  
402 killing efficacy.

### 403 **Conclusion**

404 This is the first study investigating the PK and PD profiles of antipseudomonal phage in the  
405 lungs of healthy and *P. aeruginosa*-infected mice, respectively. The safety and biodistribution of  
406 phage PEV31 over time were assessed in the lungs of healthy mice. Importantly, inhaled phages  
407 not only reduced the lung bacterial load, but also suppressed pro-inflammatory cytokines in the  
408 lungs. Bacterial antibiogram was altered upon phage treatment, where bacteria became  
409 susceptible to some, and more resistant to other antibiotics. Nonetheless, more work is required  
410 to examine the influence of phage exposure on antibiotic susceptibility of bacteria. Further *in*  
411 *vivo* toxicity and PK/PD studies evaluating various dose regimes in both acute and chronic  
412 models are urgently needed to better understand the phage and bacteria kinetics in the lungs.

### 413 **Acknowledgement**

414 This study was financially supported by National Health and Medical Research Council (Project  
415 Grant APP1140617).

### 416 **References**

- 417 1. CDC. 2019. Antibiotic Resistance Threats in the United States, 2019, *on* U.S.  
418 Department of Health and Human Services, CDC. Accessed 5th June.
- 419 2. WHO. 2015. Global action plan on antimicrobial resistance.  
420 <https://www.who.int/antimicrobial-resistance/publications/global-action-plan/en/>.  
421 Accessed
- 422 3. Theuretzbacher U, Outtersson K, Engel A, Karlen A. 2020. The global preclinical  
423 antibacterial pipeline. *Nat Rev Microbiol* 18:275-285.
- 424 4. Pang Z, Raudonis R, Glick BR, Lin TJ, Cheng Z. 2019. Antibiotic resistance in  
425 *Pseudomonas aeruginosa*: mechanisms and alternative therapeutic strategies. *Biotechnol*  
426 *Adv* 37:177-192.

- 427 5. Chang RYK, Wallin M, Lin Y, Leung SSY, Wang H, Morales S, Chan HK. 2018. Phage  
428 therapy for respiratory infections. *Adv Drug Deliv Rev* 133:76-86.
- 429 6. Chang RY, Wong J, Mathai A, Morales S, Kutter E, Britton W, Li J, Chan HK. 2017.  
430 Production of highly stable spray dried phage formulations for treatment of *Pseudomonas*  
431 *aeruginosa* lung infection. *Eur J Pharm Biopharm* 121:1-13.
- 432 7. Pallavali RR, Degati VL, Lomada D, Reddy MC, Durbaka VRP. 2017. Isolation and in  
433 vitro evaluation of bacteriophages against MDR-bacterial isolates from septic wound  
434 infections. *PLoS One* 12:e0179245.
- 435 8. Chang RYK, Chen K, Wang J, Wallin M, Britton W, Morales S, Kutter E, Li J, Chan HK.  
436 2018. Proof-of-principle study in a murine lung infection model of Antipseudomonal  
437 activity of phage PEV20 in a dry-powder formulation. *Antimicrob Agents Chemother* 62.
- 438 9. Carmody LA, Gill JJ, Summer EJ, Sajjan US, Gonzalez CF, Young RF, LiPuma JJ. 2010.  
439 Efficacy of bacteriophage therapy in a model of *Burkholderia cenocepacia* pulmonary  
440 infection. *J Infect Dis* 201:264-71.
- 441 10. Lin YW, Chang RY, Rao GG, Jermain B, Han ML, Zhao JX, Chen K, Wang JP, Barr JJ,  
442 Schooley RT, Kutter E, Chan HK, Li J. 2020. Pharmacokinetics/pharmacodynamics of  
443 antipseudomonal bacteriophage therapy in rats: a proof-of-concept study. *Clin Microbiol*  
444 *Infect* doi:10.1016/j.cmi.2020.04.039.
- 445 11. Wang JL, Kuo CF, Yeh CM, Chen JR, Cheng MF, Hung CH. 2018. Efficacy of  
446 phikm18p phage therapy in a murine model of extensively drug-resistant *Acinetobacter*  
447 *baumannii* infection. *Infect Drug Resist* 11:2301-2310.
- 448 12. Kvachadze L, Balarjishvili N, Meskhi T, Tevdoradze E, Skhirtladze N, Pataridze T,  
449 Adamia R, Topuria T, Kutter E, Rohde C, Kutateladze M. 2011. Evaluation of lytic  
450 activity of staphylococcal bacteriophage Sb-1 against freshly isolated clinical pathogens.  
451 *Microb Biotechnol* 4:643-50.
- 452 13. Zhukov-Verezhnikov NN, Peremitina LD, Berillo EA, Komissarov VP, Bardymov VM.  
453 1978. [Therapeutic effect of bacteriophage preparations in the complex treatment of  
454 suppurative surgical diseases]. *Sov Med*:64-6.
- 455 14. Ujmajuridze A, Chanishvili N, Goderdzishvili M, Leitner L, Mehnert U, Chkhotua A,  
456 Kessler TM, Sybesma W. 2018. Adapted Bacteriophages for Treating Urinary Tract  
457 Infections. *Front Microbiol* 9:1832.
- 458 15. Principi N, Silvestri E, Esposito S. 2019. Advantages and Limitations of Bacteriophages  
459 for the Treatment of Bacterial Infections. *Front Pharmacol* 10:513.
- 460 16. Roach DR, Leung CY, Henry M, Morello E, Singh D, Di Santo JP, Weitz JS, Debarbieux  
461 L. 2017. Synergy between the Host Immune System and Bacteriophage Is Essential for  
462 Successful Phage Therapy against an Acute Respiratory Pathogen. *Cell Host Microbe*  
463 22:38-47 e4.
- 464 17. Leung SSY, Carrigy NB, Vehring R, Finlay WH, Morales S, Carter EA, Britton WJ,  
465 Kutter E, Chan HK. 2019. Jet nebulization of bacteriophages with different tail  
466 morphologies - Structural effects. *Int J Pharm* 554:322-326.
- 467 18. Carrigy NB, Chang RY, Leung SSY, Harrison M, Petrova Z, Pope WH, Hatfull GF,  
468 Britton WJ, Chan HK, Sauvageau D, Finlay WH, Vehring R. 2017. Anti-Tuberculosis  
469 Bacteriophage D29 Delivery with a Vibrating Mesh Nebulizer, Jet Nebulizer, and Soft  
470 Mist Inhaler. *Pharm Res* 34:2084-2096.
- 471 19. Astudillo A, Leung SSY, Kutter E, Morales S, Chan HK. 2018. Nebulization effects on  
472 structural stability of bacteriophage PEV 44. *Eur J Pharm Biopharm* 125:124-130.

- 473 20. Marqus S, Lee L, Istivan T, Kyung Chang RY, Dekiwadia C, Chan HK, Yeo LY. 2020.  
474 High frequency acoustic nebulization for pulmonary delivery of antibiotic alternatives  
475 against *Staphylococcus aureus*. *Eur J Pharm Biopharm* 151:181-188.
- 476 21. Bonilla N, Rojas MI, Netto Flores Cruz G, Hung SH, Rohwer F, Barr JJ. 2016. Phage on  
477 tap-a quick and efficient protocol for the preparation of bacteriophage laboratory stocks.  
478 *PeerJ* 4:e2261.
- 479 22. Chang RYK, Das T, Manos J, Kutter E, Morales S, Chan HK. 2019. Bacteriophage  
480 PEV20 and Ciprofloxacin Combination Treatment Enhances Removal of *Pseudomonas*  
481 *aeruginosa* Biofilm Isolated from Cystic Fibrosis and Wound Patients. *AAPS J* 21:49.
- 482 23. Dinarello CA. 2018. Overview of the IL-1 family in innate inflammation and acquired  
483 immunity. *Immunol Rev* 281:8-27.
- 484 24. Debarbieux L, Leduc D, Maura D, Morello E, Criscuolo A, Grossi O, Balloy V, Touqui L.  
485 2010. Bacteriophages can treat and prevent *Pseudomonas aeruginosa* lung infections. *J*  
486 *Infect Dis* 201:1096-104.
- 487 25. Morello E, Sausseureau E, Maura D, Huerre M, Touqui L, Debarbieux L. 2011.  
488 Pulmonary bacteriophage therapy on *Pseudomonas aeruginosa* cystic fibrosis strains: first  
489 steps towards treatment and prevention. *PLoS One* 6:e16963.
- 490 26. Alemayehu D, Casey PG, McAuliffe O, Guinane CM, Martin JG, Shanahan F, Coffey A,  
491 Ross RP, Hill C. 2012. Bacteriophages phiMR299-2 and phiNH-4 can eliminate  
492 *Pseudomonas aeruginosa* in the murine lung and on cystic fibrosis lung airway cells.  
493 *mBio* 3:e00029-12.
- 494 27. Bivas-Benita M, Zwier R, Junginger HE, Borchard G. 2005. Non-invasive pulmonary  
495 aerosol delivery in mice by the endotracheal route. *Eur J Pharm Biopharm* 61:214-8.
- 496 28. Liu KY, Yang WH, Dong XK, Cong LM, Li N, Li Y, Wen ZB, Yin Z, Lan ZJ, Li WP, Li  
497 JS. 2016. Inhalation Study of Mycobacteriophage D29 Aerosol for Mice by Endotracheal  
498 Route and Nose-Only Exposure. *J Aerosol Med Pulm Drug Deliv* 29:393-405.
- 499 29. Imamovic L, Serra-Moreno R, Jofre J, Muniesa M. 2010. Quantification of Shiga toxin 2-  
500 encoding bacteriophages, by real-time PCR and correlation with phage infectivity. *J Appl*  
501 *Microbiol* 108:1105-14.
- 502 30. Anderson B, Rashid MH, Carter C, Pasternack G, Rajanna C, Revazishvili T, Dean T,  
503 Senecal A, Sulakvelidze A. 2011. Enumeration of bacteriophage particles: Comparative  
504 analysis of the traditional plaque assay and real-time QPCR- and nanosight-based assays.  
505 *Bacteriophage* 1:86-93.
- 506 31. You L, Yin J. 1999. Amplification and spread of viruses in a growing plaque. *J Theor*  
507 *Biol* 200:365-73.
- 508 32. Refardt D. 2012. Real-time quantitative PCR to discriminate and quantify lambdaoid  
509 bacteriophages of *Escherichia coli* K-12. *Bacteriophage* 2:98-104.
- 510 33. Duyvejonck H, Merabishvili M, Pirnay JP, De Vos D, Verbeken G, Van Belleghem J,  
511 Gryp T, De Leenheer J, Van der Borgh K, Van Simaey L, Vermeulen S, Van Mechelen  
512 E, Vaneechoutte M. 2019. Development of a qPCR platform for quantification of the five  
513 bacteriophages within bacteriophage cocktail 2 (BFC2). *Sci Rep* 9:13893.
- 514 34. Shukla S, Wen AM, Ayat NR, Commandeur U, Gopalkrishnan R, Broome AM, Lozada  
515 KW, Keri RA, Steinmetz NF. 2014. Biodistribution and clearance of a filamentous plant  
516 virus in healthy and tumor-bearing mice. *Nanomedicine (Lond)* 9:221-35.

- 517 35. Bruckman MA, Randolph LN, VanMeter A, Hern S, Shoffstall AJ, Taurog RE, Steinmetz  
518 NF. 2014. Biodistribution, pharmacokinetics, and blood compatibility of native and  
519 PEGylated tobacco mosaic virus nano-rods and -spheres in mice. *Virology* 449:163-73.
- 520 36. Zhang YY, Hu KQ. 2015. Rethinking the pathogenesis of hepatitis B virus (HBV)  
521 infection. *J Med Virol* 87:1989-99.
- 522 37. Zhang YN, Poon W, Tavares AJ, McGilvray ID, Chan WCW. 2016. Nanoparticle-liver  
523 interactions: Cellular uptake and hepatobiliary elimination. *J Control Release* 240:332-  
524 348.
- 525 38. Dai J, Chen EQ, Bai L, Gong DY, Zhou QL, Cheng X, Huang FJ, Tang H. 2012.  
526 Biological characteristics of the rtA181T/sW172\* mutant strain of Hepatitis B virus in  
527 animal model. *Virol J* 9:280.
- 528 39. Mostafalou S, Mohammadi H, Ramazani A, Abdollahi M. 2013. Different biokinetics of  
529 nanomedicines linking to their toxicity; an overview. *Daru* 21:14.
- 530 40. Nemmar A, Hoet PH, Vanquickenborne B, Dinsdale D, Thomeer M, Hoylaerts MF,  
531 Vanbilloen H, Mortelmans L, Nemery B. 2002. Passage of inhaled particles into the  
532 blood circulation in humans. *Circulation* 105:411-4.
- 533 41. Inchley CJ. 1969. The activity of mouse Kupffer cells following intravenous injection of  
534 T4 bacteriophage. *Clin Exp Immunol* 5:173-87.
- 535 42. Van Bellegheem JD, Clement F, Merabishvili M, Lavigne R, Vanechoutte M. 2017. Pro-  
536 and anti-inflammatory responses of peripheral blood mononuclear cells induced by  
537 *Staphylococcus aureus* and *Pseudomonas aeruginosa* phages. *Sci Rep* 7:8004.
- 538 43. Van Bellegheem JD, Merabishvili M, Vergauwen B, Lavigne R, Vanechoutte M. 2017. A  
539 comparative study of different strategies for removal of endotoxins from bacteriophage  
540 preparations. *J Microbiol Methods* 132:153-159.
- 541 44. Speck P, Smithyman A. 2016. Safety and efficacy of phage therapy via the intravenous  
542 route. *FEMS Microbiol Lett* 363.
- 543 45. Wienhold SM, Lienau J, Witzenrath M. 2019. Towards Inhaled Phage Therapy in  
544 Western Europe. *Viruses* 11.
- 545 46. Raetz CR, Whitfield C. 2002. Lipopolysaccharide endotoxins. *Annu Rev Biochem*  
546 71:635-700.
- 547 47. Rosadini CV, Kagan JC. 2017. Early innate immune responses to bacterial LPS. *Curr*  
548 *Opin Immunol* 44:14-19.
- 549 48. Skirecki T, Cavaillon JM. 2019. Inner sensors of endotoxin - implications for sepsis  
550 research and therapy. *FEMS Microbiol Rev* 43:239-256.
- 551 49. Labrie SJ, Samson JE, Moineau S. 2010. Bacteriophage resistance mechanisms. *Nat Rev*  
552 *Microbiol* 8:317-27.
- 553 50. Le S, Yao X, Lu S, Tan Y, Rao X, Li M, Jin X, Wang J, Zhao Y, Wu NC, Lux R, He X,  
554 Shi W, Hu F. 2014. Chromosomal DNA deletion confers phage resistance to  
555 *Pseudomonas aeruginosa*. *Sci Rep* 4:4738.
- 556 51. Azam AH, Tanji Y. 2019. Bacteriophage-host arm race: an update on the mechanism of  
557 phage resistance in bacteria and revenge of the phage with the perspective for phage  
558 therapy. *Appl Microbiol Biotechnol* 103:2121-2131.
- 559 52. Latino L, Midoux C, Vergnaud G, Pourcel C. 2019. Investigation of *Pseudomonas*  
560 *aeruginosa* strain PcyII-10 variants resisting infection by N4-like phage Ab09 in search  
561 for genes involved in phage adsorption. *PLoS One* 14:e0215456.

- 562 53. Lim WS, Ho PL, Li SF-Y, Ow DS-W. 2019. Clinical Implications of *Pseudomonas*  
563 *aeruginosa*: Antibiotic Resistance, Phage & Antimicrobial Peptide Therapy. Proceedings  
564 of the Singapore National Academy of Science 13:65-86.
- 565 54. Lin Y, Chang RYK, Britton WJ, Morales S, Kutter E, Chan HK. 2018. Synergy of  
566 nebulized phage PEV20 and ciprofloxacin combination against *Pseudomonas aeruginosa*.  
567 *Int J Pharm* 551:158-165.
- 568 55. Chan BK, Sistro M, Wertz JE, Kortright KE, Narayan D, Turner PE. 2016. Phage  
569 selection restores antibiotic sensitivity in MDR *Pseudomonas aeruginosa*. *Sci Rep*  
570 6:26717.  
571

572 **Table 1.** Antibiotic and phage susceptibility of bacterial colonies isolated from the lung  
573 homogenate before and after treatment with phage PEV31 or PBS.

574

| Time post-infection (h) | Treatment | Number of colonies observed (tested) | MIC ( $\mu\text{g/mL}$ ) |               |            |           |          | PEV31 susceptibility |
|-------------------------|-----------|--------------------------------------|--------------------------|---------------|------------|-----------|----------|----------------------|
|                         |           |                                      | Amikacin                 | Ciprofloxacin | Tobramycin | Aztreonam | Colistin |                      |
| 0                       | n/a       | 4 (4)                                | 32                       | 8             | 8          | >64       | 4        | S                    |
| 26                      | PBS       | 4 (4)                                | 32                       | 8             | 8          | >64       | 4        | S                    |
| 26                      | Phage     | 3 (8)                                | 32                       | 2             | 64         | >64       | 32       | R                    |
| 26                      | Phage     | 5 (8)                                | 32                       | 8             | 8          | >64       | 4        | S                    |

575 NOTE: MIC, minimum inhibitory concentration; S, susceptible; R, resistant.

576

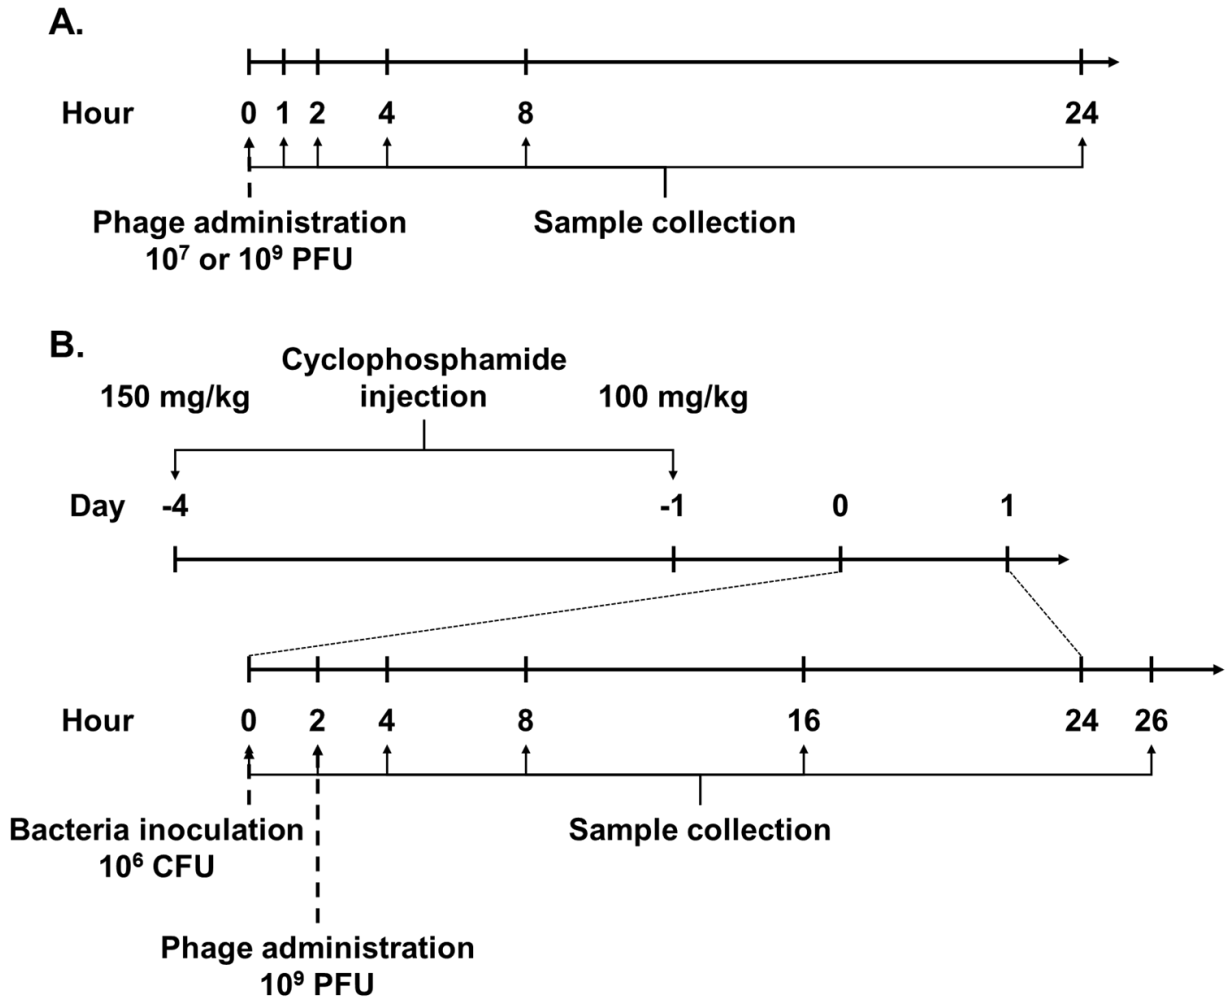

577

578 **Figure 1.** Timeline of experimental procedures to investigate the pharmacokinetics (A) and  
579 pharmacodynamics (B) of intratracheally administered PEV31 in mice.

580



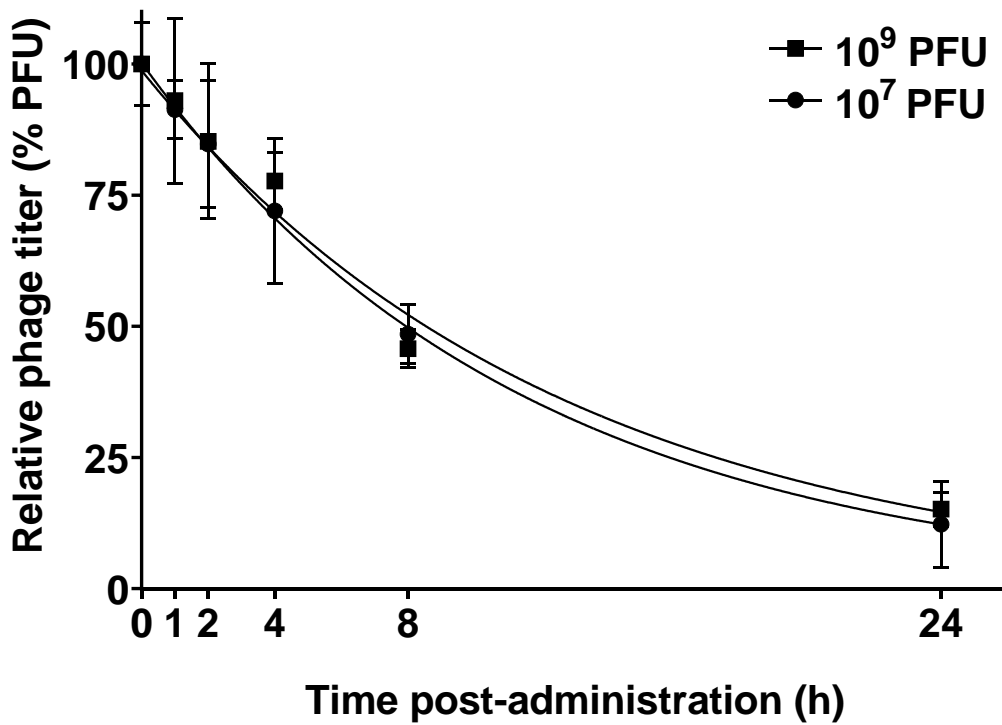

581

582

583 **Figure 2.** Relative phage titer in the lungs (lung tissues and BALF combined) of healthy mice  
584 after intratracheal administration of phage PEV31 at doses of 10<sup>7</sup> and 10<sup>9</sup> PFU. Phage titer is  
585 expressed as number of PFU relative to the administered dose. Error bar denotes standard  
586 deviation ( $n \geq 4$  except for  $t = 2$  h of the 10<sup>7</sup> PFU group, and  $t = 1$  h and 4 h of the 10<sup>9</sup> PFU  
587 group where  $n = 3$ ).

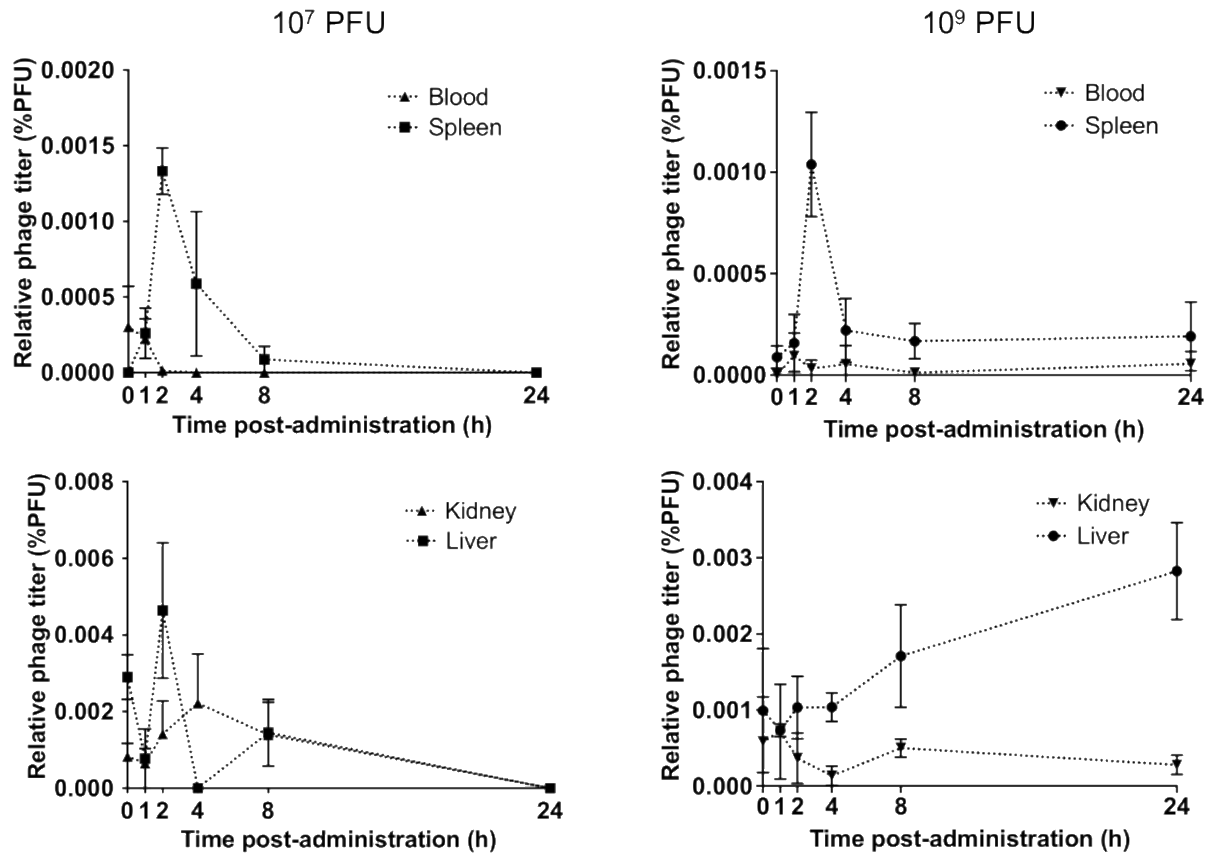

588

589 **Figure 3.** Relative phage titer in kidney, liver, blood and spleen at two phage doses. Phage titer  
590 is expressed as number of PFU relative to the administered dose. Error bar denotes standard error  
591 (n  $\geq$  4).

592

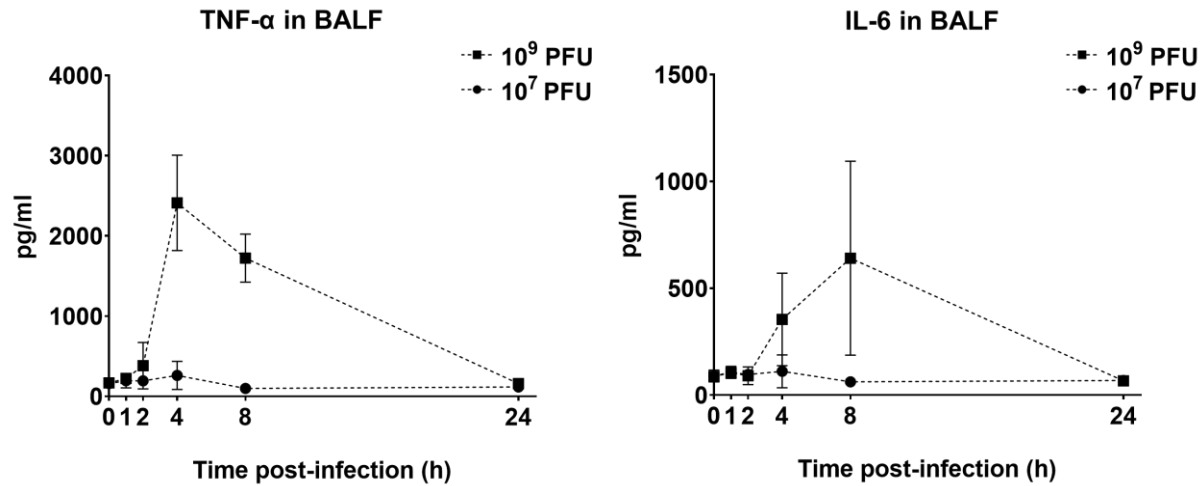

593

594 **Figure 4.** Levels of TNF- $\alpha$  and IL-6 in BALF in healthy mice after phage administration at doses  
595 of  $10^7$  and  $10^9$  PFU. Error bar denotes standard deviation ( $n \geq 4$  except for  $t = 2$  h of the  $10^7$  PFU  
596 group where  $n = 3$ ).

597

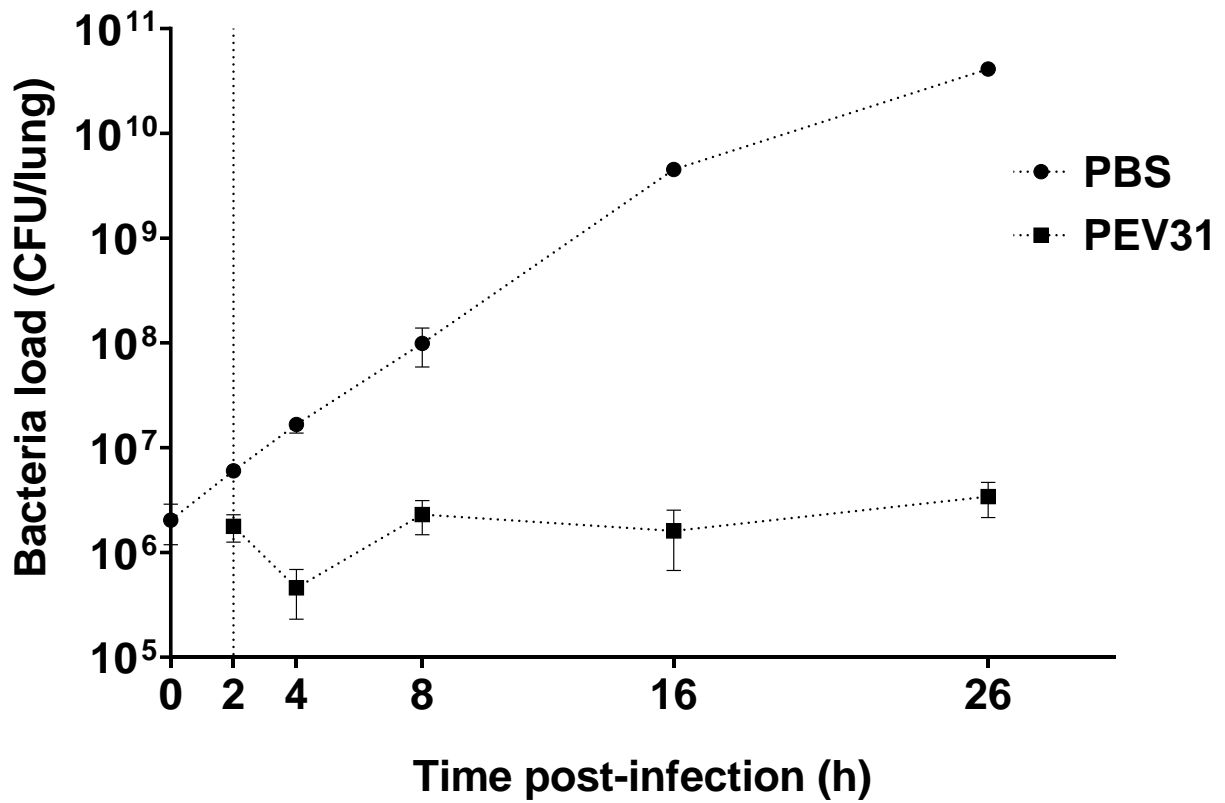

598

599 **Figure 5.** Bacterial load in the lungs of mice treated with PBS and phage over 26 hours. Dotted  
600 vertical line represents time of phage administration ( $t = 2$  h). Error bar denotes standard  
601 deviation ( $n = 2 - 4$ ).

602

603

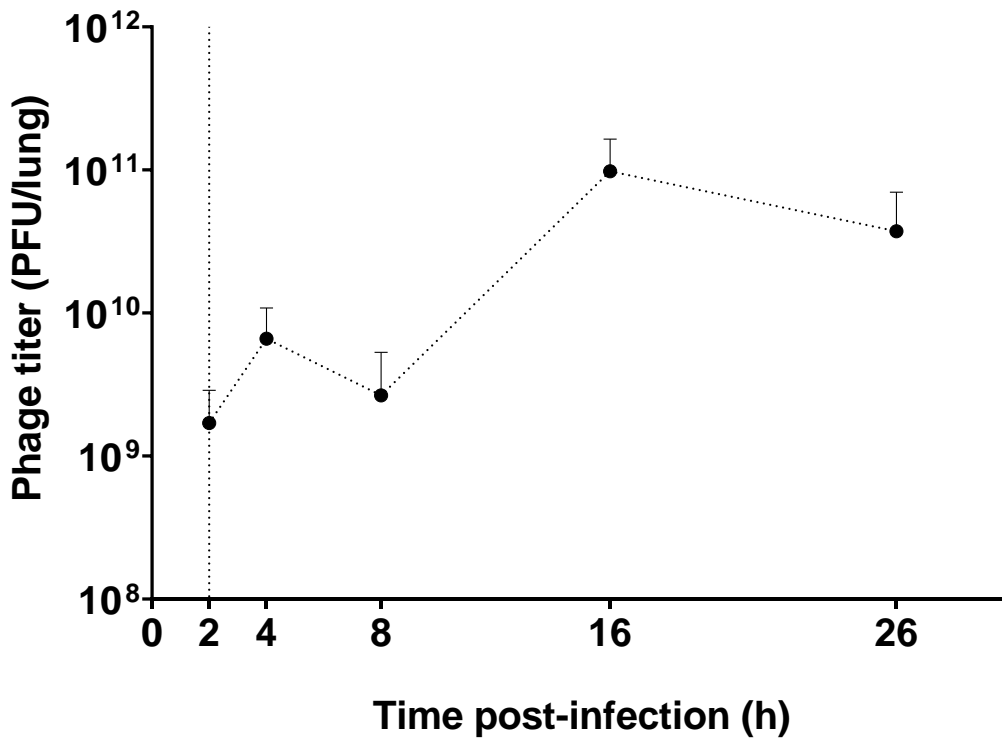

604

605 **Figure 6.** Phage titer in the lungs of mice infected with *P. aeruginosa*. Dotted vertical line  
606 represents the time ( $t = 2$  h) of phage administration ( $10^9$  PFU). Error bar denotes standard  
607 deviation ( $n = 3 - 4$ ).

608

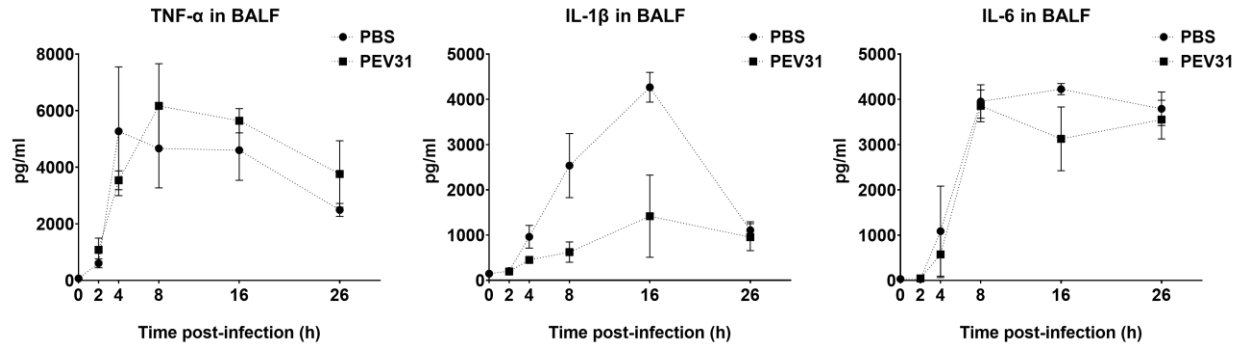

609

610 **Figure 7.** Levels of IL-6, TNF- $\alpha$  and IL-1 $\beta$  in BALF of *P. aeruginosa*-infected mice treated with

611 PBS or phage PEV31 ( $10^9$  PFU) over time. Error bar denotes standard deviation ( $n = 2 - 4$ ).
